# Supplementary material
Source: PubMed Central journal article supplement (PMC10521032)
Supplement: NIHMS1921294-supplement-Appendix_Table_1.pdf [file NIHMS1921294-supplement-Appendix_Table_1.pdf]

**Appendix Table 1. Search terms and strategy used in the updated systematic review**

| Set # | Concept         | PubMed search terms <sup>a</sup>                                                                                                                                                                                                                                                                                                                                                                                                                                                                                                                                       |
|-------|-----------------|------------------------------------------------------------------------------------------------------------------------------------------------------------------------------------------------------------------------------------------------------------------------------------------------------------------------------------------------------------------------------------------------------------------------------------------------------------------------------------------------------------------------------------------------------------------------|
| 1     | Family Planning | “family planning”[All fields] OR “family planning services”[MeSH] <sup>b</sup> OR “family planning services”[All fields] OR “family planning policy”[MeSH] OR “family planning policy”[All fields] OR “reproductive health services”[MeSH] OR “reproductive health services”[All fields] OR “Title X”[All fields] OR “Planned Parenthood”[All fields]                                                                                                                                                                                                                  |
| 2     | Contraception   | contraception[MeSH] OR contracept*[All fields] OR “contraceptive agents”[MeSH] OR “contraceptive agents”[All fields] OR “contraceptive devices”[MeSH] OR “contraceptive devices”[All fields] OR “birth control”[All fields] OR “contraception behavior”[MeSH] OR “contraception behavior”[All fields]                                                                                                                                                                                                                                                                  |
| 3     | Counseling      | counseling[MeSH] OR counseling[All fields] OR “patient-centered”[All fields] OR “patient comprehension”[All fields] OR “patient understanding”[All fields] OR “patient participation”[MeSH] OR “patient participation”[All fields] OR “patient autonomy”[All fields] OR “decision making”[MeSH] OR “decision making”[All fields] OR “active decision”[All fields] OR “informed decision”[All fields] OR “informed choice”[All fields] OR “informed patient”[All fields] OR “informed client”[All fields] OR “informed consent”[MeSH] OR “informed consent”[All fields] |
| 4     | Communication   | “communication”[All fields] OR “health communication”[MeSH] OR “health communication”[All fields] OR “risk communication”[All fields] OR “communicating risk”[All fields] OR “communication barriers”[MeSH] OR “communication barriers”[All fields] OR “patient communication”[All fields] OR “professional-patient relations”[MeSH:NoExp] OR “professional-patient relations”[All fields] OR “nurse-patient relations”[MeSH] OR “nurse-patient relations”[All fields] OR “physician-patient relations”[MeSH] OR                                                       |

| Set # | Concept                                 | PubMed search terms <sup>a</sup>                                                                                                                                                                                                                                                                                                                                                                                                                                                                                                                          |
|-------|-----------------------------------------|-----------------------------------------------------------------------------------------------------------------------------------------------------------------------------------------------------------------------------------------------------------------------------------------------------------------------------------------------------------------------------------------------------------------------------------------------------------------------------------------------------------------------------------------------------------|
|       |                                         | “physician-patient relations”[All fields] OR<br>“information dissemination”[MeSH] OR “information dissemination”[All fields] OR “access to information”[MeSH] OR “access to information”[All fields] OR “information seeking behavior”[MeSH] OR “information seeking behavior”[All fields] OR “truth disclosure”[MeSH] OR “truth disclosure”[All fields] OR “risk perception”[All fields] OR “perceived risk”[All fields] OR “perception of risk”[All fields] OR “risk management”[MeSH] OR “risk management”[All fields] OR “patient safety”[All fields] |
| 5     | Follow-Up/Continuity of Care            | “continuity of patient care”[MeSH] OR “continuity of patient care”[All fields] OR “followup”[All fields] OR “follow up”[All fields]                                                                                                                                                                                                                                                                                                                                                                                                                       |
| 6     | Education                               | “health education”[MeSH] OR “health education”[All fields] OR “health educator”[All fields] OR “patient education as topic”[MeSH] OR “patient education”[All fields] OR “health literacy”[All fields]                                                                                                                                                                                                                                                                                                                                                     |
| 7     | Adolescents                             | adolescent[MeSH] OR adolescen*[All fields] OR “adolescent behavior”[MeSH] OR “adolescent behavior”[All fields] OR “adolescent development”[MeSH] OR “adolescent development”[All fields] OR “pregnancy in adolescence”[MeSH] OR “pregnancy in adolescence”[All fields]                                                                                                                                                                                                                                                                                    |
| 8     | All Sets Combined (without Adolescents) | ((#1) OR (#2)) AND ((#3) OR (#4) OR (#5) OR (#6))                                                                                                                                                                                                                                                                                                                                                                                                                                                                                                         |
| 9     | All Sets Combined (with Adolescents)    | (#7) AND (#8)                                                                                                                                                                                                                                                                                                                                                                                                                                                                                                                                             |

<sup>a</sup> Adapted, as needed, for searches of other databases; additional databases included CINAHL, PsycINFO, HealthSTAR, POPLINE, EMBASE, Education Resources Information Center (ERIC), Campbell Collaboration Library of Systematic Reviews, Cochrane Database of Systematic Reviews (CDSR), Cochrane Central Register of Controlled Trials (CENTRAL), Database of Abstracts of Reviews of Effects (DARE), UK NHS Economic Evaluation Database (NHS EED), National Guideline Clearinghouse, UK National Institute of Clinical Excellence (NICE), Evidence for Policy and Practice Information and Coordinating Centre (EPPI-Centre), and Turning Research Into Practice (TRIP).

<sup>b</sup> Medical Subject Headings.
